# Supplementary material
Source: PubMed Central journal article supplement (PMC7553425)
Supplement: NIHMS1627221-supplement-Appendices_1-6.pdf [file NIHMS1627221-supplement-Appendices_1-6.pdf]

## Appendix 1. List of Histologic Subtype Codes

|                                                                                                                                                                                                                                                                                                                                                                                                                                                                                                                                                                        |
|------------------------------------------------------------------------------------------------------------------------------------------------------------------------------------------------------------------------------------------------------------------------------------------------------------------------------------------------------------------------------------------------------------------------------------------------------------------------------------------------------------------------------------------------------------------------|
| Endometrioid: 8140-3, 8262-3, 8380-3, 8382-3, 8383-3.                                                                                                                                                                                                                                                                                                                                                                                                                                                                                                                  |
| Serous: 8260-3, 8441-3, 8450-3, 8460-3, 8461-3.                                                                                                                                                                                                                                                                                                                                                                                                                                                                                                                        |
| Clear cell: 8005-3, 8310-3,                                                                                                                                                                                                                                                                                                                                                                                                                                                                                                                                            |
| Others: 8000-3, 8001-3, 8002-3, 8003-3, 8010-3, 8011-3, 8012-3, 8013-3, 8014-3, 8015-3, 8022-3, 8030-3, 8031-3, 8032-3, 8033-3, 8040-3, 8041-3, 8045-3, 8046-3, 8050-3, 88050, 8090-3, 8098-3, 8120-3, 8123-3, 8130-3, 8143-3, 8144-3, 8145-3, 8200-3, 8201-3, 8210-3, 8211-3, 8220-3, 8221-3, 8230-3, 8244-3, 8246-3, 8249-3, 8261-3, 8263-3, 8290-3, 8313-3, 8320-3, 8340-3, 8370-3, 8381-3, 8384-3, 8410-3, 8440-3, 8510-3, 8550-3, 8562-3, 8571-3, 8572-3, 8573-3, 8574-3, 8575-3, 8576-3, 8830-3, 8960-3, 8990-3, 9014-3, 9015-3, 9130-3, 9133-3, 9150-3, 9508-3. |
| Carcinosarcoma: 8950-3, 8951-3, 8980-3, 8981-3,                                                                                                                                                                                                                                                                                                                                                                                                                                                                                                                        |
| Sarcoma: 8004-3, 8800-3, 8801-3, 8802-3, 8803-3, 8804-3, 8805-3, 8810-3, 8811-3, 8814-3, 8840-3, 8850-3, 8853-3, 8854-3, 8855-3, 8858-3, 8860-3, 8890-3, 8891-3, 8895-3, 8896-3, 8897-3, 8900-3, 8901-3, 8902-3, 8910-3, 8912-3, 8920-3, 8930-3, 8931-3, 8933-3, 8934-3, 8935-3, 8963-3, 8991-3, 9120-3, 9180-3, 9220-3, 9240-3, 9260-3, 9581-3                                                                                                                                                                                                                        |
| Metastatic tumor: 8141-3, 8490-3, 8580-3, 8590-3, 8600-3, 8620-3, 8650-3, 8680-3, 8720-3, 8936-3, 9064-3, 9071-3, 9080-3, 9085-3, 9100-3, 9101-3, 9104-3, 9105-3, 9110-3, 9364-3, 9380-3, 9473-3, 9560-3, 9561-3                                                                                                                                                                                                                                                                                                                                                       |
| Undifferentiated: 8020-3, 8021-3                                                                                                                                                                                                                                                                                                                                                                                                                                                                                                                                       |
| Squamous: 8051-3, 8052-3, 8070-3, 8071-3, 8072-3, 8073-3, 8074-3, 8075-3, 8076-3, 8083-3, 8084-3                                                                                                                                                                                                                                                                                                                                                                                                                                                                       |
| Mixed: 8255-3, 8323-3, 8940-3                                                                                                                                                                                                                                                                                                                                                                                                                                                                                                                                          |
| Mucinous: 8470-3, 8471-3, 8480-3, 8481-3, 8482-3                                                                                                                                                                                                                                                                                                                                                                                                                                                                                                                       |
| Adenosquamous: 8560-3                                                                                                                                                                                                                                                                                                                                                                                                                                                                                                                                                  |
| Adenocarcinoma with squamous metaplasia: 8570-3                                                                                                                                                                                                                                                                                                                                                                                                                                                                                                                        |

Matsuo K, Machida H, Shoupe D, Melamed A, Muderspach LI, Roman LD, et al. Ovarian conservation and overall survival in young women with early-stage low-grade endometrial cancer. *Obstet Gynecol* 2016; 128.

The authors provided this information as a supplement to their article.

## Appendix 2. Patient Demographics (N=86,005)

|                             |                |
|-----------------------------|----------------|
| Age (y)                     | 61.5 (±11.8)   |
| ≥ 50                        | 73,145 (85.0%) |
| 40 - 49                     | 9,850 (11.5%)  |
| 30 - 39                     | 2,708 (3.1%)   |
| < 30                        | 302 (0.4%)     |
| Ethnicity                   |                |
| White                       | 68,873 (80.1%) |
| Black                       | 3,967 (4.6%)   |
| Hispanic                    | 6,590 (7.7%)   |
| Asian                       | 4,892 (5.7%)   |
| Pacific Islander            | 1,292 (1.5%)   |
| Others                      | 121 (0.1%)     |
| Unknown                     | 270 (0.3%)     |
| Marital status              |                |
| Single                      | 12,527 (14.6%) |
| Married                     | 48,241 (56.1%) |
| Others                      | 22,090 (25.6%) |
| Unknown                     | 3,147 (3.7%)   |
| Registry Area               |                |
| West                        | 45,183 (52.5%) |
| Central                     | 19,398 (22.6%) |
| East                        | 21,424 (24.9%) |
| Year at diagnosis           |                |
| 1983 - 1989                 | 8,019 (9.3%)   |
| 1990 - 1999                 | 18,975 (22.1%) |
| 2000 - 2009                 | 43,671 (50.8%) |
| 2010 - 2012                 | 15,340 (17.8%) |
| Stage                       |                |
| IA                          | 68,468 (79.6%) |
| IB                          | 10,578 (12.3%) |
| I NOS                       | 6,959 (8.1%)   |
| Histology                   |                |
| Grade 1 endometrioid        | 53,402 (62.1%) |
| Grade 2 endometrioid        | 32,603 (37.9%) |
| Tumor size                  |                |
| ≤ 2.0 cm                    | 16,412 (19.1%) |
| 2.1 - 4.0 cm                | 15,885 (18.5%) |
| 4.1 - 6.0 cm                | 6,516 (7.6%)   |
| 6.1 - 8.0 cm                | 1,688 (2.0%)   |
| 8.1 - 10.0 cm               | 515 (0.6%)     |
| > 10.0 cm                   | 304 (0.4%)     |
| Unknown                     | 44,685 (52.0%) |
| Surgery type                |                |
| Total/pan/simple hyst       | 75,997 (88.4%) |
| Extended hyst/mRH/RH        | 7,240 (8.4%)   |
| Hyst, NOS                   | 1,987 (2.3%)   |
| Supracervical/subtotal hyst | 725 (0.8%)     |
| Others                      | 56 (0.1%)      |

Matsuo K, Machida H, Shoupe D, Melamed A, Muderspach LI, Roman LD, et al. Ovarian conservation and overall survival in young women with early-stage low-grade endometrial cancer. *Obstet Gynecol* 2016; 128.

The authors provided this information as a supplement to their article.

|                      |                |
|----------------------|----------------|
| Adjuvant radiation   |                |
| None                 | 73,715 (85.7%) |
| WPRT ± ICBT          | 6,960 (8.1%)   |
| ICBT alone           | 4,249 (4.9%)   |
| Other radiation type | 306 (0.4%)     |
| Unknown              | 775 (0.9%)     |

Number (%) or mean ( $\pm$ SD) is shown. \*included undifferentiated endometrioid type, †adenocarcinoma with squamous metaplasia. Abbreviations: hyst, hysterectomy; mRH, modified hysterectomy; RH, radical hysterectomy; WPRT, whole pelvic radiation therapy; ICBT, intra-cavitary brachytherapy; and Surg, surgery.

Matsuo K, Machida H, Shoupe D, Melamed A, Muderspach LI, Roman LD, et al. Ovarian conservation and overall survival in young women with early-stage low-grade endometrial cancer. *Obstet Gynecol* 2016; 128.

The authors provided this information as a supplement to their article.

**Appendix 3. Causes of Death for Women Aged <50 With Stage, I Grade 1 Endometrioid Endometrial Cancer (n=9,110)**

|                        | Event No. | Cumulative risk |           |           | P           |
|------------------------|-----------|-----------------|-----------|-----------|-------------|
|                        |           | 10-yr (%)       | 15-yr (%) | 20-yr (%) |             |
| Endometrial cancer     |           |                 |           |           | .31         |
| Oophorectomy           | 96        | 1.4%            | 2.1%      | 2.3%      |             |
| Ovarian conservation   | 8         | 1.1%            | 1.1%      | 1.1%      |             |
| Cardiovascular disease |           |                 |           |           | <b>.042</b> |
| Oophorectomy           | 115       | 1.1%            | 1.9%      | 3.7%      |             |
| Ovarian conservation   | 6         | 0.2%            | 0.2%      | 2.3%      |             |
| Other chronic diseases |           |                 |           |           | .20         |
| Oophorectomy           | 76        | 0.6%            | 1.3%      | 2.9%      |             |
| Ovarian conservation   | 5         | 0.2%            | 0.5%      | 1.5%      |             |
| Other causes           |           |                 |           |           | .83         |
| Oophorectomy           | 157       | 1.6%            | 3.2%      | 5.4%      |             |
| Ovarian conservation   | 17        | 1.6%            | 2.2%      | 4.2%      |             |
| Other malignancies     |           |                 |           |           | .21         |
| Oophorectomy           | 156       | 1.7%            | 2.9%      | 5.2%      |             |
| Ovarian conservation   | 13        | 1.1%            | 2.0%      | 2.7%      |             |

Number (%) is shown. Log-rank test for *P*-values. Significant *P*-values are emboldened. \*including musculoskeletal tissue. Abbreviations: OC, ovarian conservation and ;10-yr, 15-yr, and 20-yr, 10-, 15-, 20-year cumulative risk of death.

Matsuo K, Machida H, Shoupe D, Melamed A, Muderspach LI, Roman LD, et al. Ovarian conservation and overall survival in young women with early-stage low-grade endometrial cancer. *Obstet Gynecol* 2016; 128.

The authors provided this information as a supplement to their article.

**Appendix 4. Cumulative incidence of death due to cardiovascular disease in women aged <50 with stage I grade 1 and 2 endometrioid endometrial cancer.**

**A. Grade 1 endometrioid stage I (age <50)**

**B. Grade 2 endometrioid stage I (age <50)**

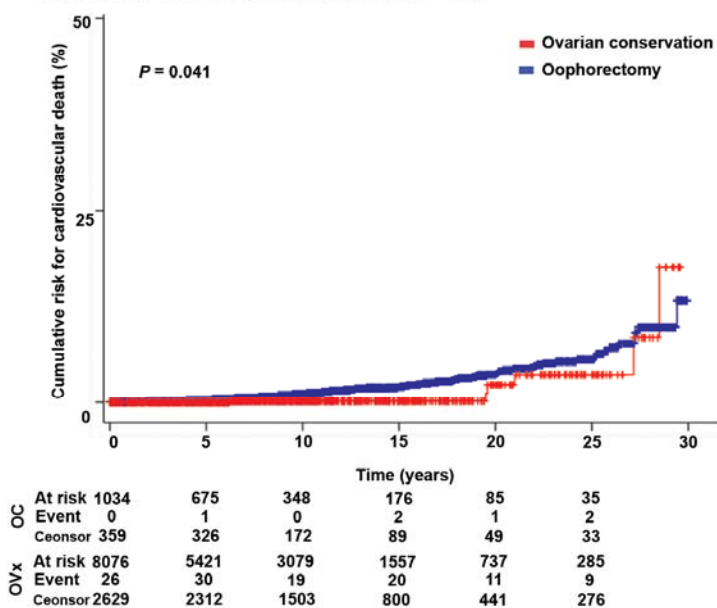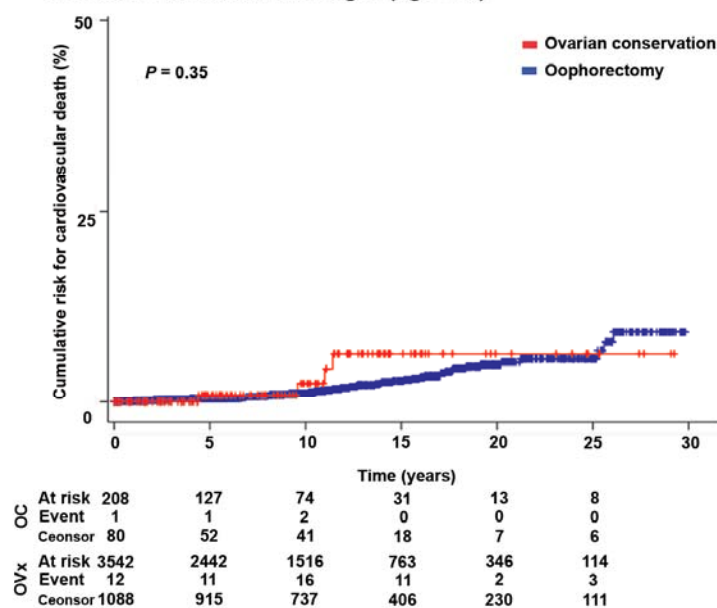

Log-rank test for *P*-value. Y-axis was truncated to 0-50%. Survival curves were constructed for: grade 1 endometrioid (panel A) and grade 2 endometrioid (panel B) endometrial cancer.

Matsuo K, Machida H, Shoupe D, Melamed A, Muderspach LI, Roman LD, et al. Ovarian conservation and overall survival in young women with early-stage low-grade endometrial cancer. *Obstet Gynecol* 2016; 128.

The authors provided this information as a supplement to their article.

**Appendix 5. Ovarian Conservation in Women Aged <50 With Stage I, Grade 2 Endometrioid Endometrial Cancer (n=3,750)**

|                             | <b>OC</b>   | <b>Oophorectomy</b> | <b>P</b>         |
|-----------------------------|-------------|---------------------|------------------|
| No.                         | 208 (5.5%)  | 3,542 (94.5%)       |                  |
| Age (y)                     | 39.9 (±6.4) | 43.2 (±5.3)         | <b>&lt;.001</b>  |
| 40-49                       | 118 (4.0%)  | 2,809 (96.0%)       |                  |
| 30-39                       | 76 (10.4%)  | 652 (89.6%)         |                  |
| < 30                        | 14 (14.7%)  | 81 (85.3%)          |                  |
| Ethnicity                   |             |                     | <b>.015</b>      |
| White                       | 121 (4.9%)  | 2,340 (95.1%)       |                  |
| Black                       | 23 (9.2%)   | 227 (90.8%)         |                  |
| Hispanic                    | 38 (7.8%)   | 451 (92.2%)         |                  |
| Asian                       | 18 (4.5%)   | 380 (95.5%)         |                  |
| Others                      | 7 (4.9%)    | 135 (95.1%)         |                  |
| Unknown                     | 1 (10.0%)   | 9 (90.0%)           |                  |
| Marital status              |             |                     | .22              |
| Single                      | 68 (6.2%)   | 1,032 (93.8%)       |                  |
| Others                      | 129 (5.1%)  | 2,380 (94.9)        |                  |
| Unknown                     | 11 (7.8%)   | 130 (92.2%)         |                  |
| Registry Area               |             |                     | .99              |
| West                        | 113 (5.5%)  | 1,941 (94.5%)       |                  |
| Central                     | 48 (5.6%)   | 808 (94.4%)         |                  |
| East                        | 47 (5.6%)   | 793 (94.4%)         |                  |
| Year at diagnosis           |             |                     | .15              |
| 1983-1989                   | 12 (4.4%)   | 258 (95.6%)         |                  |
| 1990-1999                   | 40 (4.6%)   | 833 (95.4%)         |                  |
| 2000-2009                   | 114 (5.6%)  | 1,911 (94.4%)       |                  |
| 2010-2012                   | 42 (7.4%)   | 540 (92.8%)         |                  |
| Stage                       |             |                     | .66              |
| IA                          | 171 (5.4%)  | 2,996 (94.6%)       |                  |
| IB                          | 18 (6.4%)   | 263 (93.6%)         |                  |
| I NOS                       | 19 (6.3%)   | 283 (93.7%)         |                  |
| Tumor size                  |             |                     | <b>.011</b>      |
| ≤ 2.0 cm                    | 46 (7.6%)   | 560 (92.4%)         |                  |
| 2.1 - 4.0 cm                | 24 (3.9%)   | 586 (96.1%)         |                  |
| 4.1 - 6.0 cm                | 15 (4.1%)   | 352 (95.9%)         |                  |
| > 6.0 cm                    | 6 (2.8%)    | 207 (97.2%)         |                  |
| Unknown                     | 117 (6.0%)  | 1,837 (94.0%)       |                  |
| Surgery type                |             |                     | <b>&lt; .001</b> |
| Total/pan/simple hyst       | 193 (6.0%)  | 3,004 (94.0%)       |                  |
| Subtotal/supracervical hyst | 9 (25.0%)   | 27 (75.0%)          |                  |
| Others                      | 6 (1.1%)    | 511 (1.2%)          |                  |
| Adjuvant radiation          |             |                     | .71              |
| No                          | 181 (5.7%)  | 3,008 (94.3%)       |                  |
| Yes                         | 25 (4.8%)   | 495 (95.2%)         |                  |
| Unknown                     | 2 (4.9%)    | 39 (95.1%)          |                  |

Matsuo K, Machida H, Shoupe D, Melamed A, Muderspach LI, Roman LD, et al. Ovarian conservation and overall survival in young women with early-stage low-grade endometrial cancer. *Obstet Gynecol* 2016; 128.

The authors provided this information as a supplement to their article.

Number (%), mean ( $\pm$ SD) is shown. Percentages are shown per row. Student *t* test or chi-square test for *P* values. Significant *P*-values are emboldened. Abbreviations: NOS, not otherwise specified; hyst, hysterectomy.

Matsuo K, Machida H, Shoupe D, Melamed A, Muderspach LI, Roman LD, et al. Ovarian conservation and overall survival in young women with early-stage low-grade endometrial cancer. *Obstet Gynecol* 2016; 128.

The authors provided this information as a supplement to their article.

**Appendix 6. Comparison of Patient Demographics Between Grade 1 and 2 Endometrioid Types Among Women Aged <50 With Stage I Endometrial Cancer (n=12,860)**

|                               | <b>Grade 1<br/>endometrioid</b> | <b>Grade 2<br/>endometrioid</b> | <b>P</b>        |
|-------------------------------|---------------------------------|---------------------------------|-----------------|
| No.                           | 9,110                           | 3,750                           |                 |
| Age (y)                       | 42.8 (±5.4)                     | 43.1 (±5.4)                     | <b>.023</b>     |
| 40-49                         | 6923 (76.0%)                    | 2927 (78.1%)                    |                 |
| < 40                          | 2187 (24.0%)                    | 823 (21.9%)                     |                 |
| Ethnicity                     |                                 |                                 | <b>&lt;.001</b> |
| White                         | 5824 (63.9%)                    | 2461 (65.6%)                    |                 |
| Black                         | 478 (5.2%)                      | 250 (6.7%)                      |                 |
| Hispanic                      | 1427 (15.7%)                    | 489 (13.0%)                     |                 |
| Asian                         | 950 (10.4%)                     | 398 (10.6%)                     |                 |
| Pacific Islander              | 373 (4.1%)                      | 134 (3.6%)                      |                 |
| Others                        | 14 (0.2%)                       | 8 (0.2%)                        |                 |
| Unknown                       | 44 (0.5%)                       | 10 (0.3%)                       |                 |
| Marital status                |                                 |                                 | .10             |
| Single                        | 2474 (27.2%)                    | 1100 (29.3%)                    |                 |
| Married                       | 5297 (58.1%)                    | 2073 (55.3%)                    |                 |
| Divorced                      | 752 (8.3%)                      | 334 (8.9%)                      |                 |
| Separated                     | 107 (1.2%)                      | 46 (1.2%)                       |                 |
| Unmarried or domestic partner | 3 (0.0%)                        | 1 (0.0%)                        |                 |
| Widowed                       | 118 (1.3%)                      | 55 (1.5%)                       |                 |
| Unknown                       | 359 (3.9%)                      | 141 (3.8%)                      |                 |
| Registry Area                 |                                 |                                 | .48             |
| West                          | 4987 (54.7%)                    | 2053 (54.7%)                    |                 |
| Central                       | 2010 (22.1%)                    | 857 (22.9%)                     |                 |
| East                          | 2113 (23.2%)                    | 840 (22.4%)                     |                 |
| Year at diagnosis             |                                 |                                 | <b>&lt;.001</b> |
| 1983-1989                     | 641 (7.0%)                      | 270 (7.2%)                      |                 |
| 1990-1999                     | 1814 (19.9%)                    | 873 (23.3%)                     |                 |
| 2000-2009                     | 5070 (55.7%)                    | 2025 (54.0%)                    |                 |
| 2010-2012                     | 1585 (17.4%)                    | 582 (15.5%)                     |                 |
| Stage                         |                                 |                                 | <b>&lt;.001</b> |
| IA                            | 7894 (86.7%)                    | 3168 (84.5%)                    |                 |
| IB                            | 258 (2.8%)                      | 281 (7.5%)                      |                 |
| I NOS                         | 958 (10.5%)                     | 301 (8.0%)                      |                 |
| Tumor size                    |                                 |                                 | <b>&lt;.001</b> |
| ≤ 2.0 cm                      | 2040 (22.4%)                    | 606 (16.2%)                     |                 |
| 2.1 - 4.0 cm                  | 1153 (12.7%)                    | 610 (16.2%)                     |                 |
| 4.1 - 6.0 cm                  | 576 (6.3%)                      | 367 (9.8%)                      |                 |
| 6.1 - 8.0 cm                  | 213 (2.3%)                      | 124 (3.3%)                      |                 |
| 8.1 - 10.0 cm                 | 85 (0.9%)                       | 56 (1.5%)                       |                 |
| > 10.0 cm                     | 52 (0.6%)                       | 33 (0.9%)                       |                 |
| Unknown                       | 4991 (54.8%)                    | 1954 (52.1%)                    |                 |
| Surgery type                  |                                 |                                 | <b>&lt;.001</b> |
| Total/pan/simple hyst         | 8147 (89.4%)                    | 3197 (85.3%)                    |                 |
| Extended hyst, mRH, RH        | 590 (6.5%)                      | 427 (11.4%)                     |                 |
| Hyst, NOS                     | 217 (2.4%)                      | 89 (2.4%)                       |                 |

Matsuo K, Machida H, Shoupe D, Melamed A, Muderspach LI, Roman LD, et al. Ovarian conservation and overall survival in young women with early-stage low-grade endometrial cancer. *Obstet Gynecol* 2016; 128.

The authors provided this information as a supplement to their article.



|                             |              |              |                 |
|-----------------------------|--------------|--------------|-----------------|
| Subtotal/supracervical hyst | 152 (1.7%)   | 36 (1.0%)    |                 |
| Others                      | 4 (0.0%)     | 1 (0.0%)     |                 |
| Ovarian conservation        |              |              | <b>&lt;.001</b> |
| No                          | 8076 (88.6%) | 3542 (94.5%) |                 |
| Yes                         | 1034 (11.4%) | 208 (5.5%)   |                 |
| Adjuvant radiation          |              |              | <b>&lt;.001</b> |
| None                        | 8646 (94.9%) | 3189 (85.0%) |                 |
| WPRT ± ICBT                 | 219 (2.4%)   | 303 (8.1%)   |                 |
| ICBT alone                  | 155 (1.7%)   | 207 (5.5%)   |                 |
| Others                      | 25 (0.3%)    | 10 (0.3%)    |                 |
| Unknown                     | 65 (0.7%)    | 41 (1.1%)    |                 |

Number (%) or mean ( $\pm$ SD) is shown. Percentages are shown per column. Student *t* test or chi-square test for *P*-values. Significant *P*-values are emboldened. Abbreviations: hyst, hysterectomy; mRH, modified hysterectomy; RH, radical hysterectomy; WPRT, whole pelvic radiation therapy; and ICBT, intra-cavitary brachytherapy.

Matsuo K, Machida H, Shoupe D, Melamed A, Muderspach LI, Roman LD, et al. Ovarian conservation and overall survival in young women with early-stage low-grade endometrial cancer. *Obstet Gynecol* 2016; 128.

The authors provided this information as a supplement to their article.
